# Supplementary material for: Near-infrared luminescence and high thermal stability of Rb2NaScF6:Cr3+ phosphor for spectroscopy applications
Source: Royal Society of Chemistry journal article supplement (doi:10.1039/d3ma00522d), 2023-01-01
Supplement: d3ma00522d1.pdf [file d3ma00522d1.pdf]

# Electronic Supplementary Information (ESI)

## Near-infrared luminescence and high thermal stability of $\text{Rb}_2\text{NaScF}_6:\text{Cr}^{3+}$ phosphor for spectroscopy applications

Lingxiang Chu, Yi Qin, Tao Yang, Jing Wan, Qiang Zhou,\* Huaijun Tang, Yanqing Ye,  
Zhengliang Wang\*

Key Laboratory of Green Chemistry Materials in University of Yunnan Province, Key Laboratory  
of Advanced Synthetic Chemistry (Yunnan Minzu University) of National Ethnic Affairs  
Commission, School of Chemistry and Environment, Yunnan Minzu University, Kunming  
650500, P. R. China.

Corresponding Author:

\*Email: q-zhou@ymu.edu.cn (Q. Zhou)

wangzhengliang@foxmail.com (Z. Wang)

The NIR emission can be verified by calculating the ratio of  $Dq/B$  for the estimation of crystal field strength surrounding  $\text{Cr}^{3+}$  ion being weak or strong with a dividing point of 2.3. The local crystal field strength  $Dq$  and the related parameter  $B$  can be calculated according to the following equations:<sup>[S1]</sup>

$$10Dq = E(^4T_2) = E(^4A_2 \rightarrow ^4T_2)$$

$$\frac{Dq}{B} = \frac{15 (\Delta E/Dq - 8)}{(\Delta E/Dq)^2 - 10(\Delta E/Dq)}$$

where  $\Delta E$  means the energy difference between  $^4T_2$  and  $^4T_1$  levels, which can be obtained from the PLE peak energies of  $^4T_1$  (22831  $\text{cm}^{-1}$ ) and  $^4T_2$  (15528  $\text{cm}^{-1}$ ) levels. The  $Dq$ ,  $B$  and  $Dq/B$  values calculated according to the above formula are 1552  $\text{cm}^{-1}$ , 782  $\text{cm}^{-1}$  and 1.98, illustrating  $\text{Cr}^{3+}$  ions undergo a weak crystal field in RNSF host.

To further explain the concentration quenching mechanism, the following formula was adopted to calculate the critical distance  $R_c$  among adjacent  $\text{Cr}^{3+}$  ions:<sup>[S2]</sup>

$$R_c \approx 2 \left( \frac{3V}{4\pi x_c N} \right)^{1/3}$$

where  $N$  is the site number that can be replaced by  $\text{Cr}^{3+}$  in each unit cell.  $V$  and  $x_c$  represent unit cell volume and doping concentration. Based on the refinement result of RNSF:0.03Cr,  $V = 637.9565 \text{ \AA}^3$ ,  $x_c = 0.03$ ,  $N = 4$ ,  $R_c$  is calculated to be 21.66  $\text{\AA}$ , which is about four times larger than the exchange interaction value (5  $\text{\AA}$ ), indicating that the non-radiative relaxation is assignable to the multipole interaction.

According to Dexter theory, the main type of multipolar interaction can be evaluated *via* the following equation:<sup>[S3, S4]</sup>

$$\frac{I}{x} = K [1 + \beta(x)^{\theta/3}]^{-1}$$

Here,  $I$  and  $x$  are the emission intensity and  $\text{Cr}^{3+}$  dopant concentration, respectively.  $K$  and  $\beta$  are the known constants. By plotting the relationship between  $\log(I/x)$  and  $\log(x)$ , a linear fitting curve with a slope of -0.841 and a reliable correlation coefficient of 0.9957 is obtained, and the calculated  $\theta$  value is 2.523, which is close to 3. This result strongly indicates that the energy transfer between the nearest or next nearest  $\text{Cr}^{3+}$  ions is the main reason for the concentration quenching of  $\text{Cr}^{3+}$  in RNSF host.

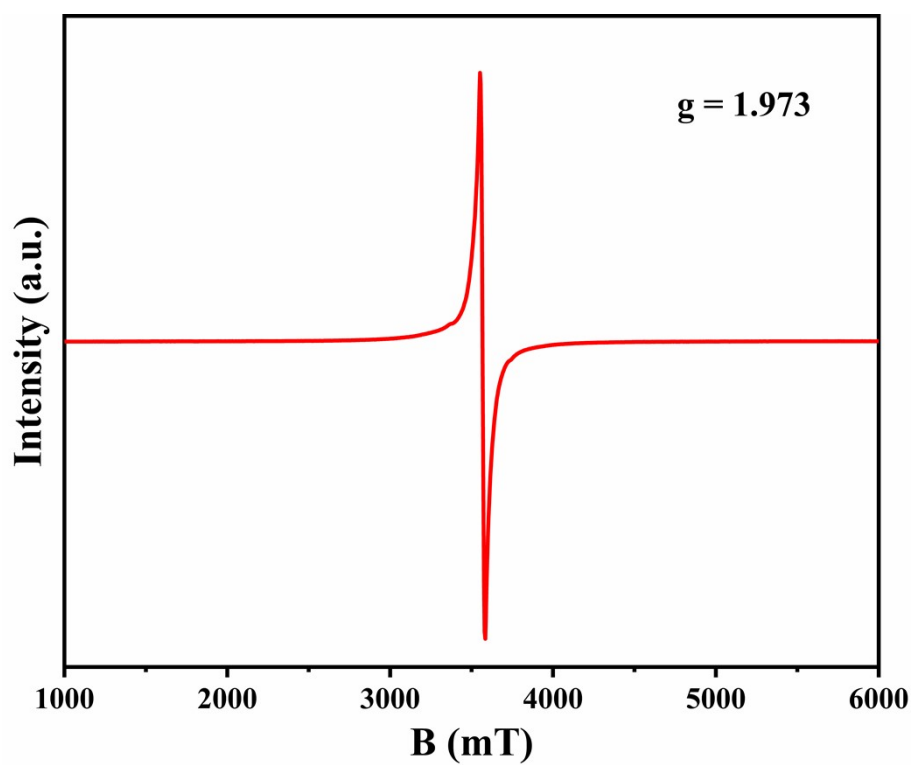

**Fig. S1.** EPR spectrum of RNSF:Cr.

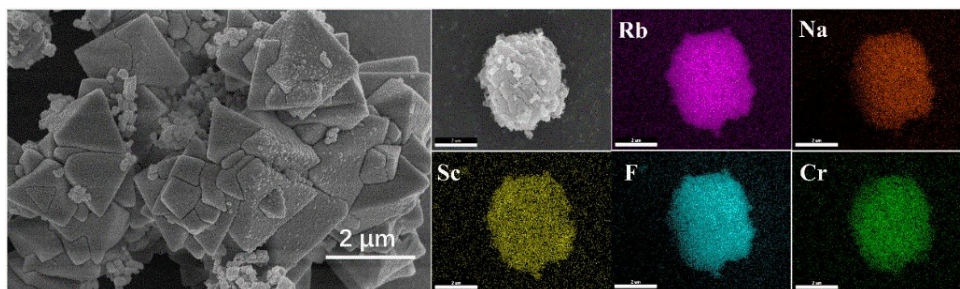

**Fig. S2.** SEM and elemental mapping images of RNSF:Cr product.

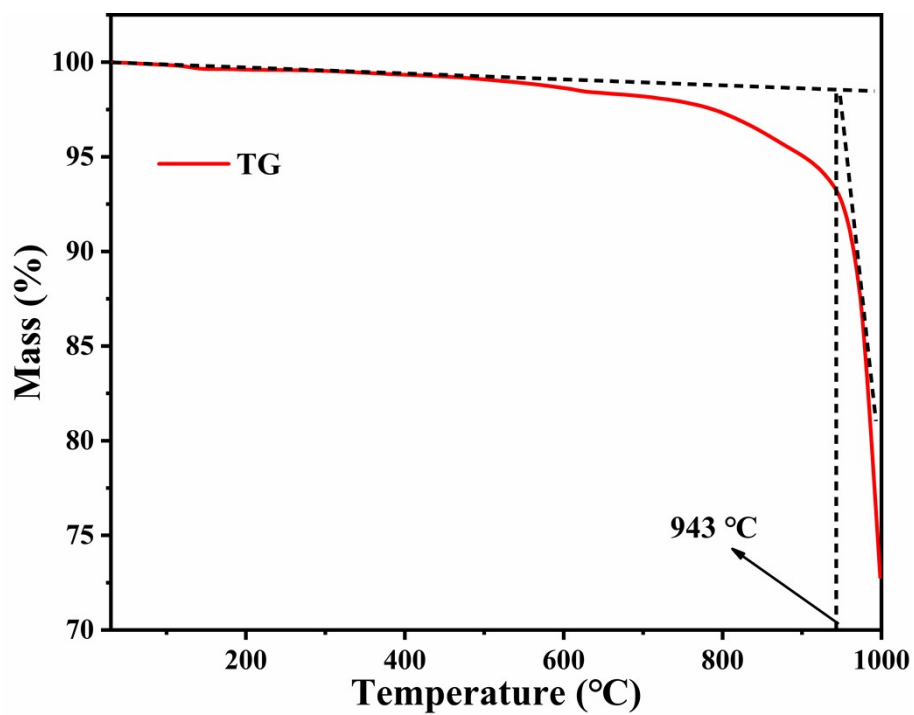

**Fig. S3.** TG curve of RNSF:Cr phosphor.

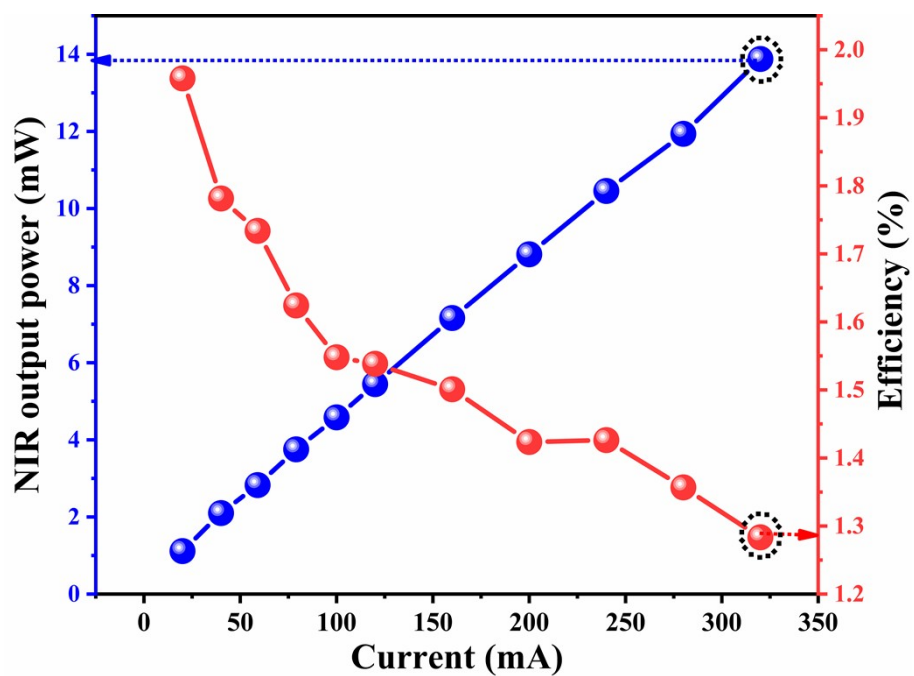

**Fig. S4.** NIR output power and photoelectric conversion efficiency of pc-LED device ranging from 20 to 320 mA.

**Table S1.** The crystallographic parameters of RNSF host and RNSF:0.03Cr sample.

| Formula               | RNSF         | RNSF:0.03Cr  |
|-----------------------|--------------|--------------|
| Crystal system        | Cubic        | Cubic        |
| Space group           | $Fm\bar{3}m$ | $Fm\bar{3}m$ |
| Space group number    | 225          | 225          |
| a (Å)                 | 8.6098       | 8.6085       |
| b (Å)                 | 8.6098       | 8.6085       |
| c (Å)                 | 8.6098       | 8.6085       |
| $\alpha$              | 90.0000      | 90.0000      |
| $\beta$               | 90.0000      | 90.0000      |
| $\gamma$              | 90.0000      | 90.0000      |
| $V$ (Å <sup>3</sup> ) | 638.2544     | 637.9565     |
| Z                     | 4            | 4            |
| $R_{wp}$ (%)          | 7.83%        | 7.28%        |
| $R_p$ (%)             | 5.43%        | 5.07%        |
| $\chi^2$              | 1.992        | 1.978        |

**Table S2.** Photoluminescence properties of the Cr<sup>3+</sup>-activated fluoride NIR-emitting phosphors.

| Phosphor                                             | $\lambda_{em}$ (nm) | $I_{150^\circ C}$ (%) | Ref.      |
|------------------------------------------------------|---------------------|-----------------------|-----------|
| K <sub>2</sub> NaScF <sub>6</sub> :Cr <sup>3+</sup>  | 765                 | 89.6                  | [S5]      |
| K <sub>2</sub> NaAlF <sub>6</sub> :Cr <sup>3+</sup>  | 728                 | 96.5                  | [S6]      |
| K <sub>2</sub> NaGaF <sub>6</sub> :Cr <sup>3+</sup>  | 748                 | 82.1                  | [S6]      |
| K <sub>2</sub> NaInF <sub>6</sub> :Cr <sup>3+</sup>  | 774                 | 78.3                  | [S6]      |
| Cs <sub>2</sub> KGaF <sub>6</sub> :Cr <sup>3+</sup>  | 782                 | 88.7                  | [S7]      |
| Cs <sub>2</sub> KAlF <sub>6</sub> :Cr <sup>3+</sup>  | 755                 | 90.2                  | [S8]      |
| Rb <sub>2</sub> KAlF <sub>6</sub> :Cr <sup>3+</sup>  | 745                 | 95.3                  | [S8]      |
| Na <sub>3</sub> AlF <sub>6</sub> :Cr <sup>3+</sup>   | 720                 | 70                    | [S9]      |
| K <sub>3</sub> Al/GaF <sub>6</sub> :Cr <sup>3+</sup> | 750                 | 33                    | [S10]     |
| LiCaAlF <sub>6</sub> :Cr <sup>3+</sup>               | 764                 | 66.63                 | [S11]     |
| LiSrAlF <sub>6</sub> :Cr <sup>3+</sup>               | 820                 | 55.47                 | [S11]     |
| NaSbF <sub>4</sub> :Cr <sup>3+</sup>                 | 760                 | 56.7                  | [S12]     |
| Rb <sub>2</sub> NaScF <sub>6</sub> :Cr <sup>3+</sup> | 775                 | 92                    | This work |

## Reference:

- [S1] S. Adachi, *J. Lumin.*, 2021, **232**, 117844.
- [S2] Y. Chen, F. Liu, Z. Zhang, J. Hong, M.S. Molokeev, I.A. Bobrikov, J. Shi, J. Zhou, M. Wu, *J. Mater. Chem. C*, 2022, **10**, 7049–7057.
- [S3] J. Chen, C. Guo, Z. Yang, T. Li, J. Zhao, *J. Am. Ceram. Soc.*, 2016, **99**, 218–225.
- [S4] L. You, R. Tian, T. Zhou, R. J. Xie, *Chem. Eng. J.*, 2021, **417**, 129224.
- [S5] E. Song, H. Ming, Y. Zhou, F. He, J. Wu, Z. Xia, Q. Zhang, *Laser Photonics Rev.*, 2021, **15**, 2000410.
- [S6] J. Li, H. Zhe, H. Ming, Y. Zhou, Y. Ye, Q. Zhou, Z. Wang, *Mater. Today Chem.*, 2022, **24**, 100839.
- [S7] Z. Wu, X. Han, J. Wang, Y. Zhou, K. Xing, S. Cao, J. Zhao, B. Zou, R. Zeng, *J. Mater. Chem. C*, 2022, **10**, 10292-10301.
- [S8] Q. Fan, J. Li, J. Yang, Y. Zhou, Q. Zhou, Z. Wang, *Mater. Res. Bull.*, 2023, **158**, 112065.
- [S9] D. Yu, Y. Zhou, C. Ma, J. H. Melman, K. M. Baroudi, M. LaCapra, R. E. Riman, *ACS Appl. Electron. Mater.*, 2019, **1**, 2325–2333.
- [S10] C. Lee, Z. Bao, M. H. Fang, T. Lesniewski, S. Mahlik, M. Grinberg, G. Leniec, S. M. Kaczmarek, M. G. Brik, Y. T. Tsai, T. L. Tsai, R. S. Liu, *Inorg. Chem.*, 2020, **59**, 376–385.
- [S11] D. Wu, L. Liu, H. Liang, H. Duan, W. Nie, J. Wang, J. Peng, X. Ye, *Ceram. Int.*, 2022, **48**, 387–396.
- [S12] X. Zhang, K. Chen, T. Deng, J. Yuan, R. Zhou, T. Yu, Y. Zhou, E. Song, *Mater. Today Chem.*, 2022, **26**, 101194.
